# Supplementary figures and images for: Functional limb muscle innervation prior to cholinergic transmitter specification during early metamorphosis in Xenopus
Source: eLife journal article supplement (doi:10.7554/elife.30693), 2018-05-30

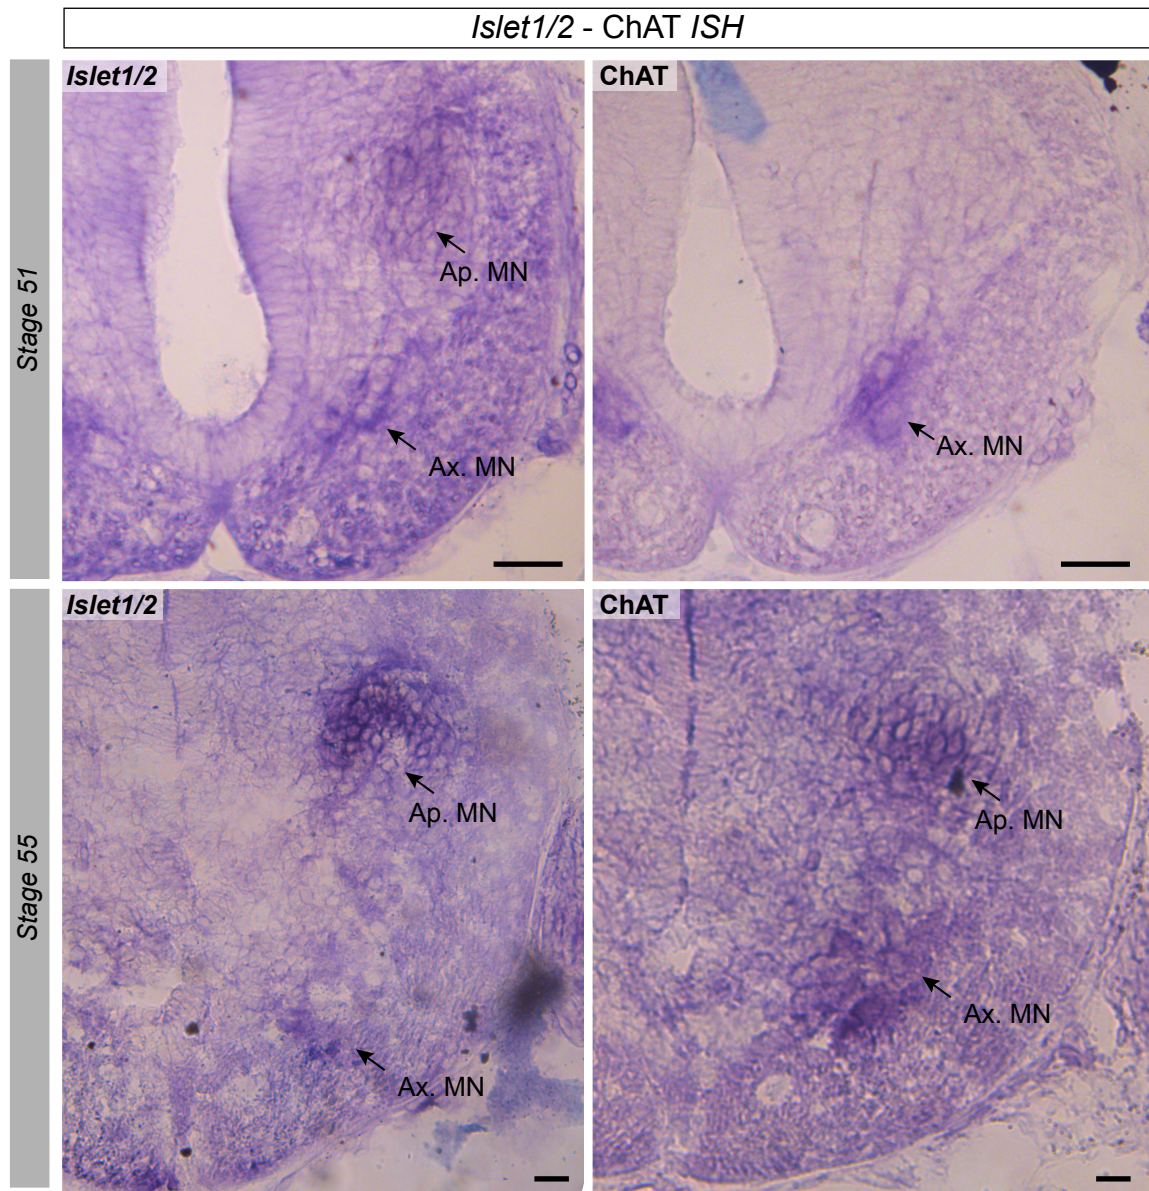

Figure 3 supplement 1

Supplement: supp [file elife-30693-supp-v1.zip]

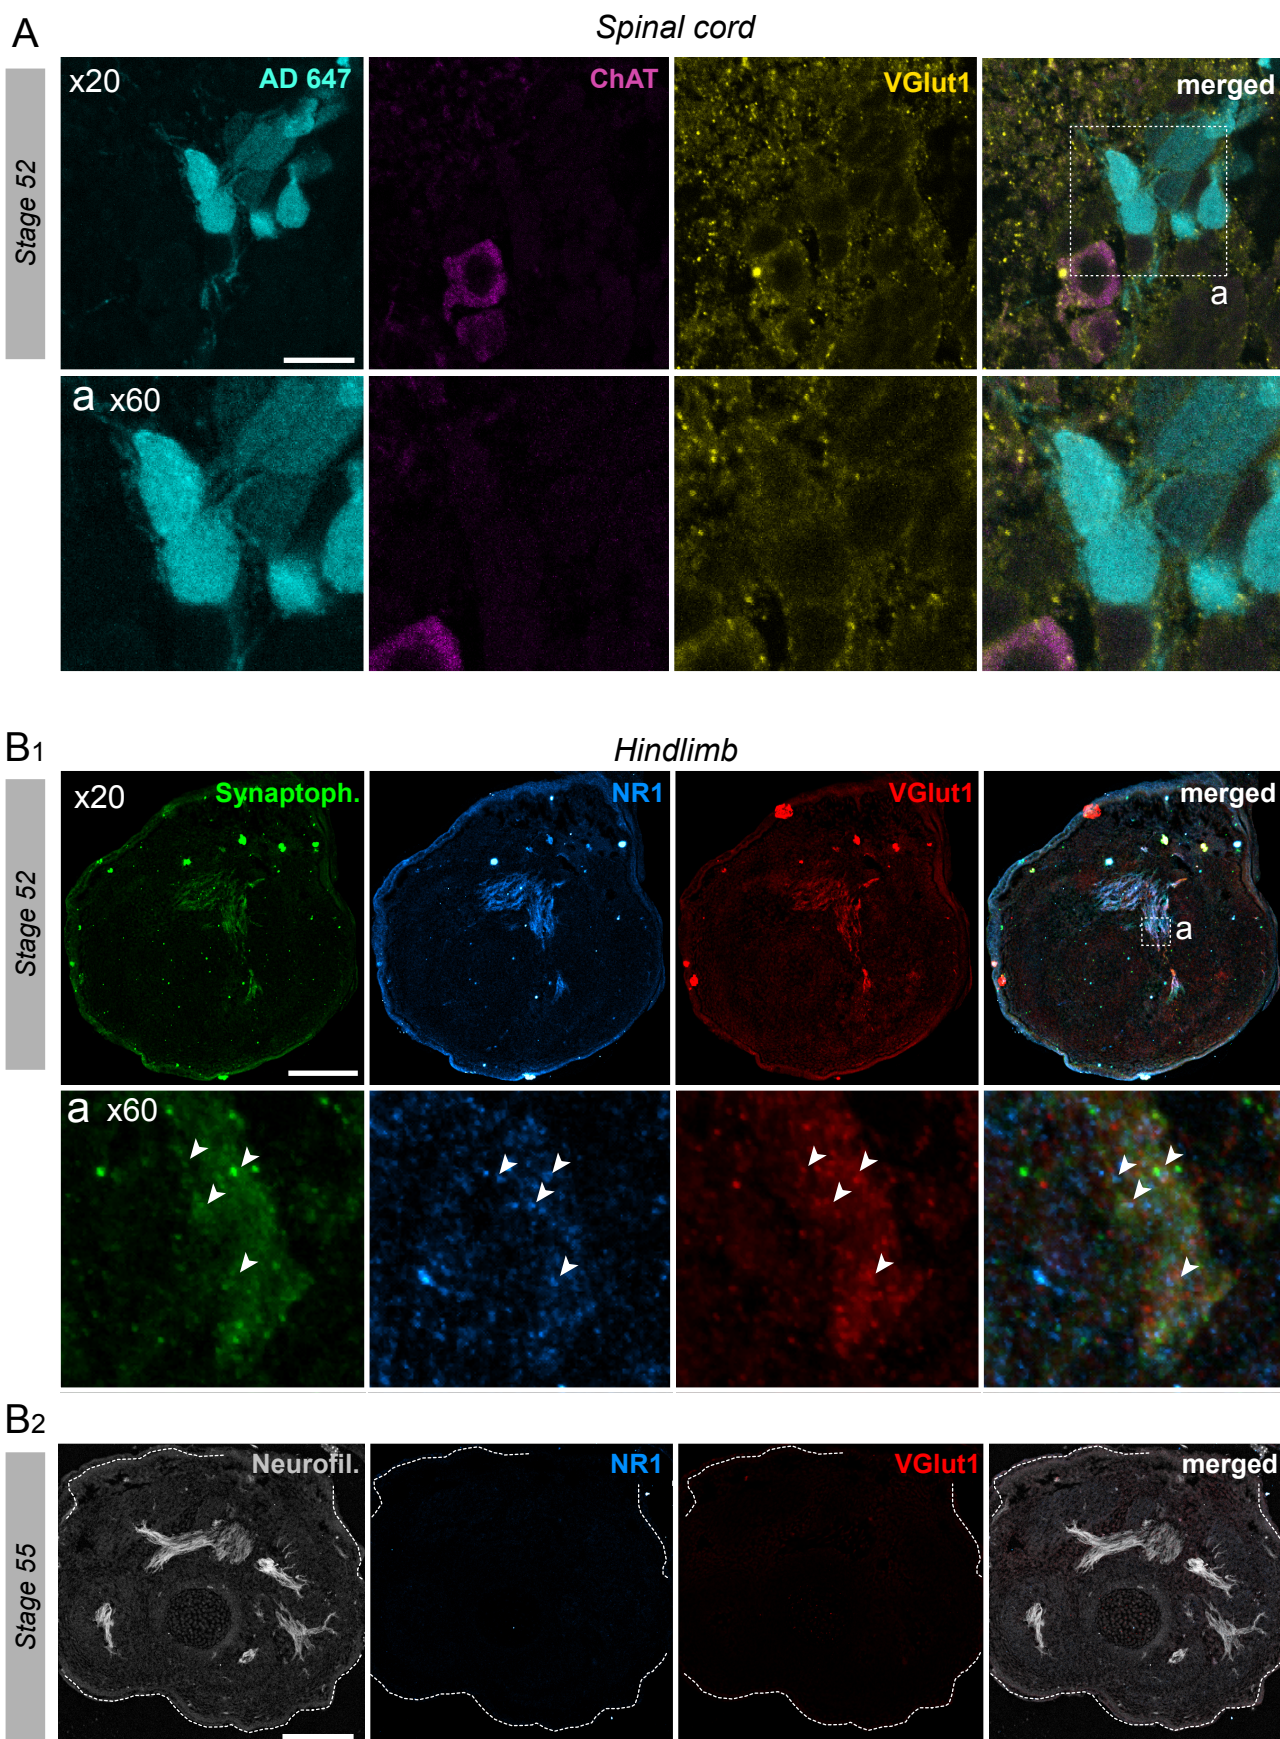

Figure 5 supplement 1

Supplement: supp [file elife-30693-supp-v1.zip]

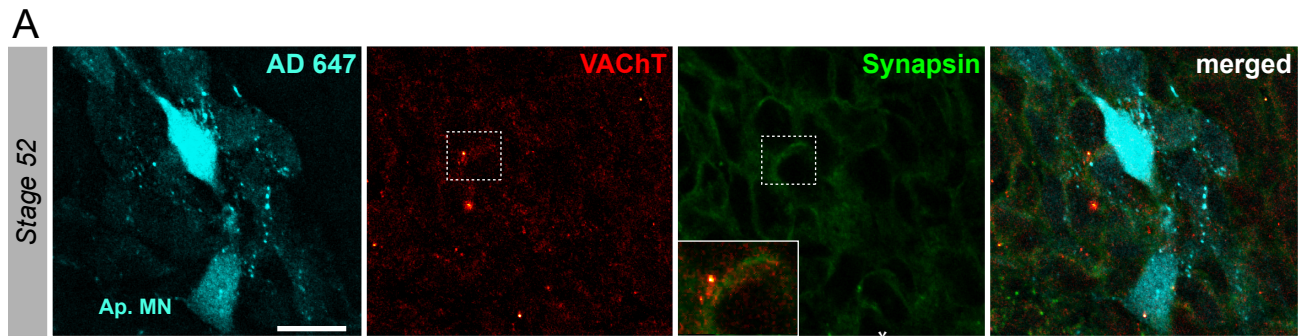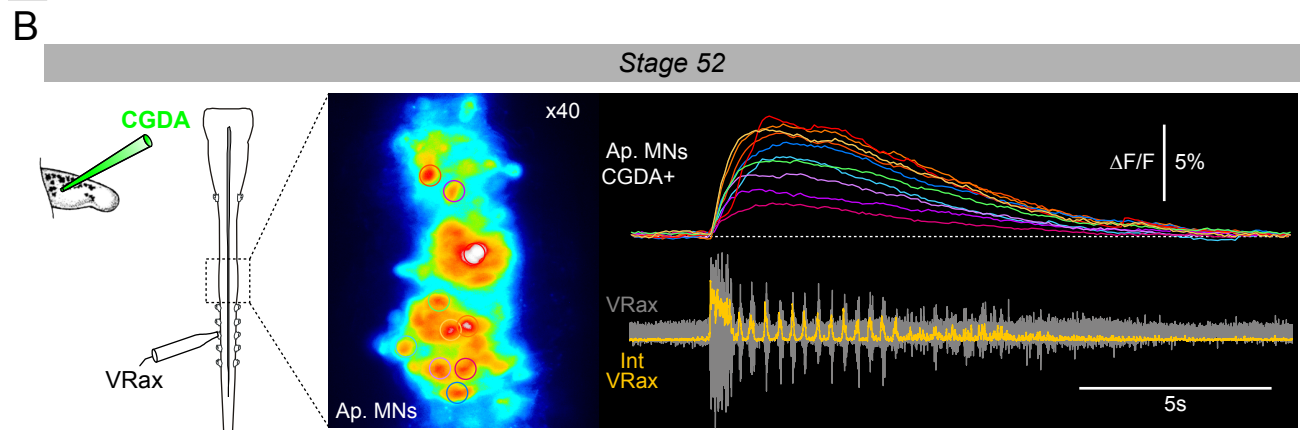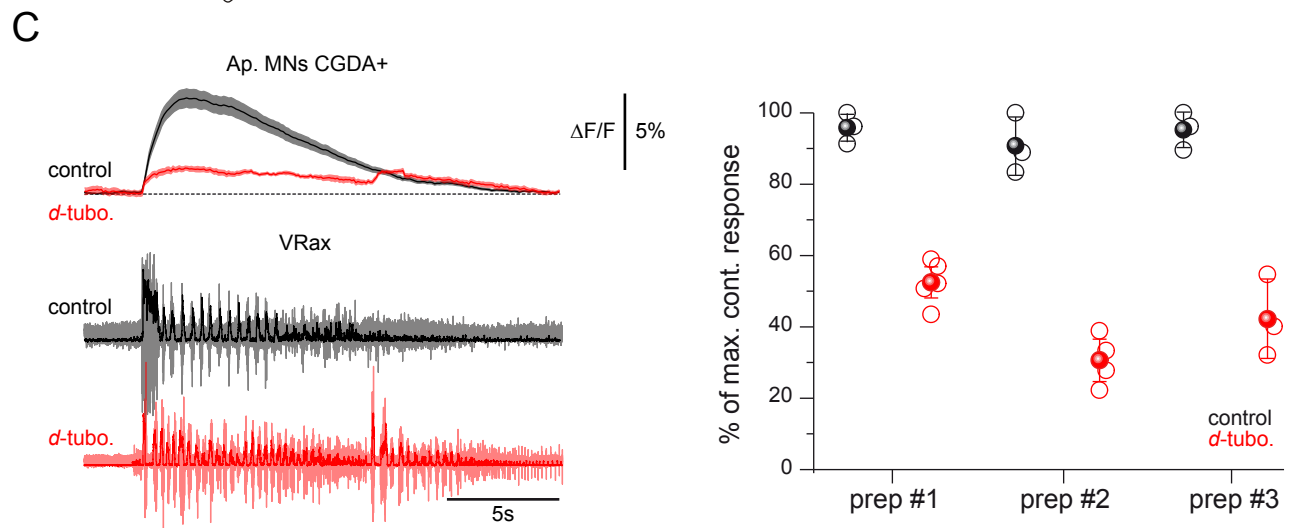

Figure 4 supplement 1

Supplement: supp [file elife-30693-supp-v1.zip]
